# Supplementary material for: Annotation, classification, genomic organization and expression of the Vitis vinifera CYPome
Source: PubMed Central journal article supplement (PMC6023221; doi:10.1371/journal.pone.0199902), 2018-06-28
Supplement: pone.0199902.s001.pdf [file pone.0199902.s001.pdf]

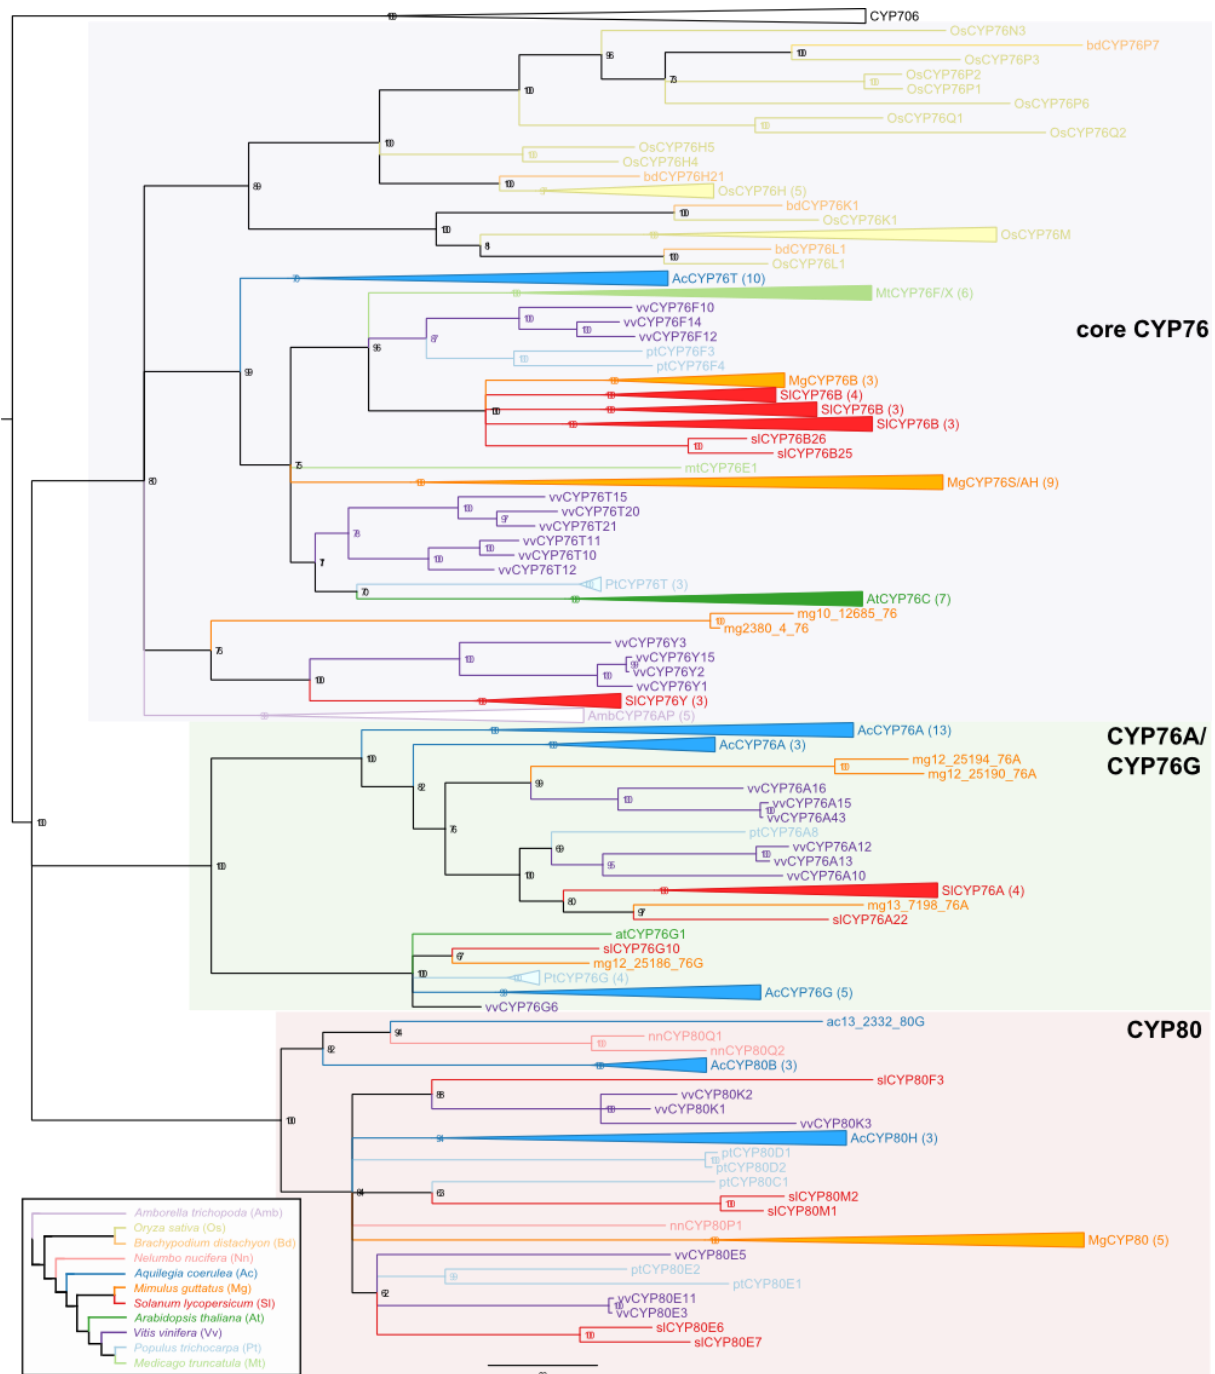

**S1 Fig. Phylogeny of CYP80 and CYP76 in angiosperms.** Maximum likelihood tree of full length CYP76 and CYP80 protein sequences from a selection of angiosperms, rooted with CYP706 from all the included species. Nodes with bootstrap values below 60 are collapsed to trifurcations. Species specific clades with more than two members (except *V. vinifera*) are collapsed to triangles. The label of the triangle gives the subfamily and the number of members contained in the clade.
