# Supplementary material for: Annotation, classification, genomic organization and expression of the Vitis vinifera CYPome
Source: PubMed Central journal article supplement (PMC6023221; doi:10.1371/journal.pone.0199902), 2018-06-28
Supplement: pone.0199902.s002.pdf [file pone.0199902.s002.pdf]

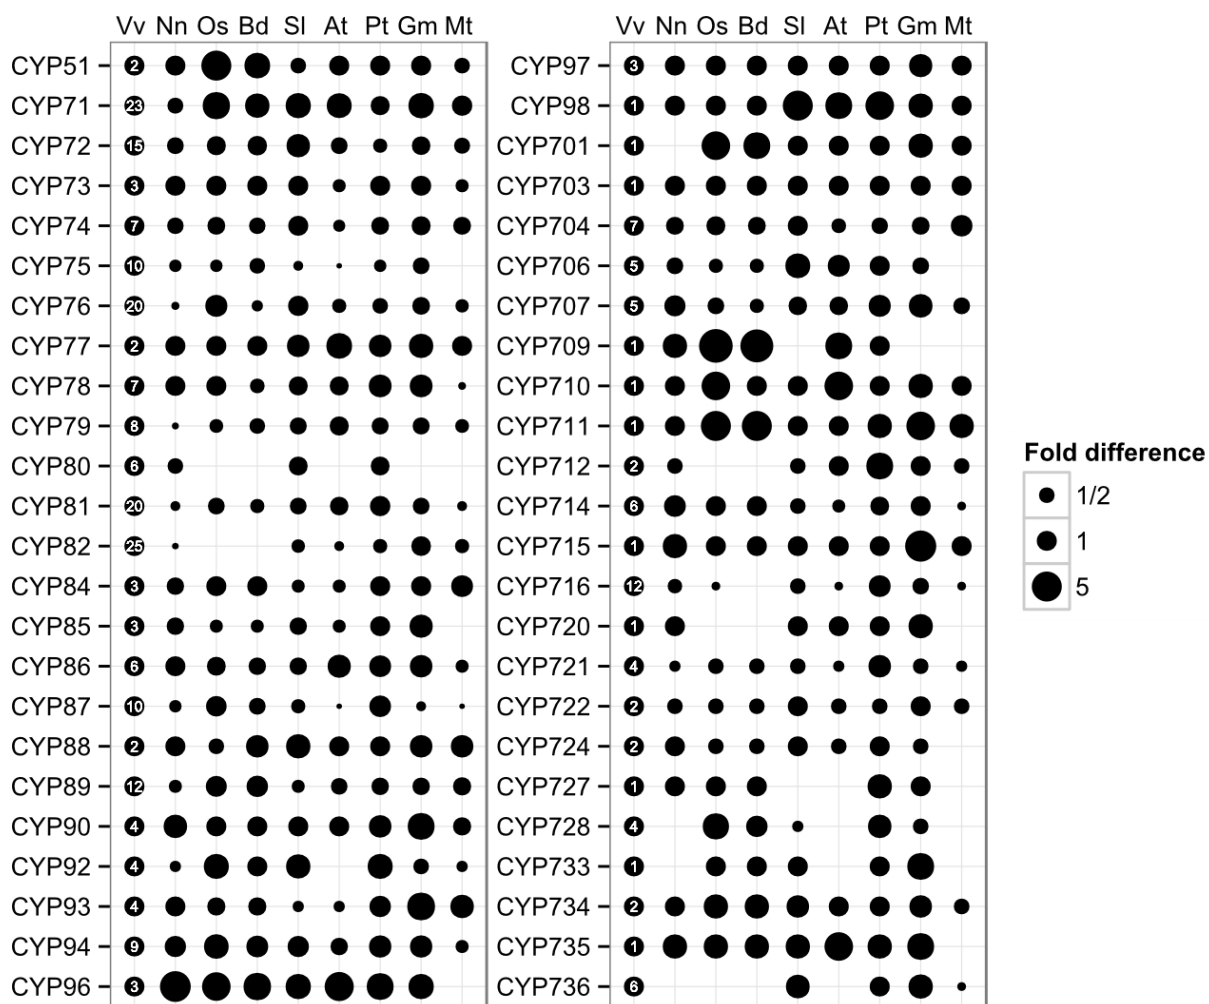

**S2 Fig. Comparison of the number of P450 genes per family between species.** Dot size is proportional to the relative family size (number of genes per family) in a given species compared to *Vitis vinifera* (Vv = *Vitis vinifera*, Nn = *Nelumbo nucifera*, Os = *Oryza sativa*, Bd = *Brachypodium distachyon*, Sl = *Solanum lycopersicum*, At = *Arabidopsis thaliana*, Pt = *Populus trichocarpa*, Gm = *Glycine max*, Mt = *Medicago truncatula*). The numbers in the first column are the absolute family sizes (numbers of genes per family) in *Vitis vinifera*. The number of genes per family was retrieved from the cytochrome P450 homepage. Pseudogenes and families not present in *V. vinifera* (CYP83, CYP99, CYP702, CYP705, CYP708, CYP718 and CYP729) were excluded from the count.
