# Supplementary material for: Annotation, classification, genomic organization and expression of the Vitis vinifera CYPome
Source: PubMed Central journal article supplement (PMC6023221; doi:10.1371/journal.pone.0199902), 2018-06-28
Supplement: pone.0199902.s003.pdf [file pone.0199902.s003.pdf]

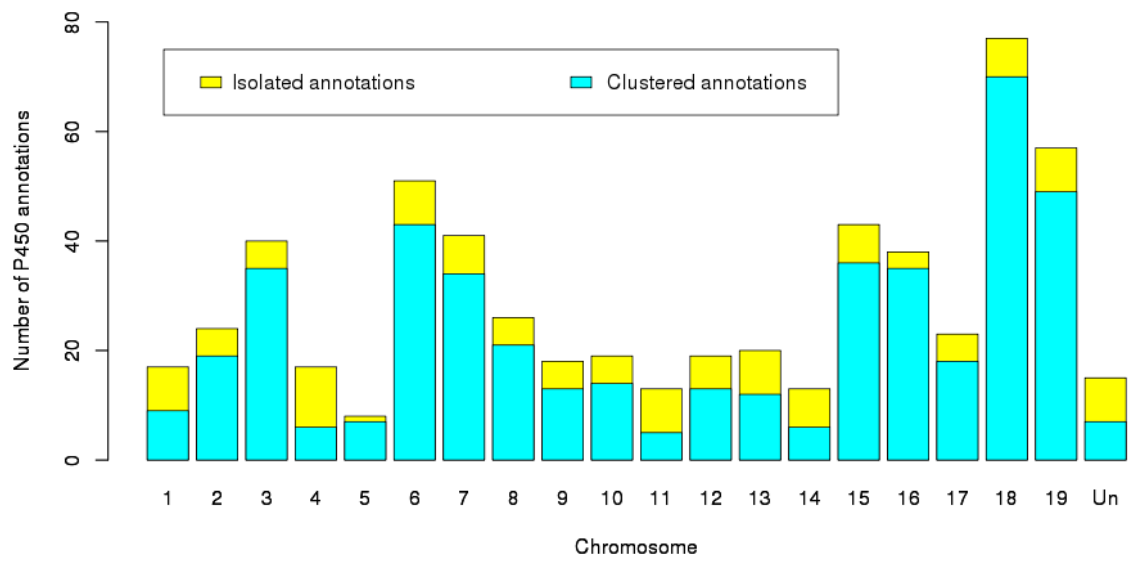

**S3 Fig. Distribution of the *V. vinifera* P450s per chromosome.** The blue bar corresponds to clustered annotations and the yellow bar to the isolated annotations. The “Unknown chromosome” is labeled as “Un”.
