# Supplementary material for: Annotation, classification, genomic organization and expression of the Vitis vinifera CYPome
Source: PubMed Central journal article supplement (PMC6023221; doi:10.1371/journal.pone.0199902), 2018-06-28
Supplement: pone.0199902.s007.pdf [file pone.0199902.s007.pdf]

**S1 Table. List of P450 families with majority of its members grouped in physical clusters.**

| Family | Family size (total sequences) | Number of clustered members | Examples of functions in other organisms                                                                                                                                                                                                                                                                                                                                                                                                             |
|--------|-------------------------------|-----------------------------|------------------------------------------------------------------------------------------------------------------------------------------------------------------------------------------------------------------------------------------------------------------------------------------------------------------------------------------------------------------------------------------------------------------------------------------------------|
| CYP82  | 69                            | 66                          | Biosynthesis of homoterpenes in <i>A. thaliana</i> [1], opioids in <i>Papaver somniferum</i> [2–4].                                                                                                                                                                                                                                                                                                                                                  |
| CYP71  | 51                            | 45                          | Biosynthesis of monoterpenoids in mint species <i>Mentha x piperita</i> and <i>Mentha x spicata</i> [5], cyanogenic glucosides in cassava ( <i>Manihot esculenta</i> ) [6], furanocoumarins in several species [7], artemisinin in <i>Artemisia annua</i> [8], flavonoids in soybean ( <i>Glycine max</i> ) [9].                                                                                                                                     |
| CYP81  | 50                            | 42                          | Biosynthesis of indole glucosinolates in <i>A. thaliana</i> [10], isoflavonoid phytoalexins in <i>Medicago truncatula</i> , <i>G. echinata</i> and, <i>Lotus japonicus</i> [9], sesamin in <i>Sesamum spp.</i> [11]                                                                                                                                                                                                                                  |
| CYP76  | 42                            | 42                          | Biosynthesis of monoterpene volatiles in <i>A. thaliana</i> [12], monoterpene indole alkaloids in <i>Catharanthus roseus</i> [13,14], sesquiterpene volatiles in sandalwood ( <i>Santalum album</i> ) [15], phytoalexins in rice ( <i>Oryza sativa</i> ) [16,17], tanshinones in Chinese sage ( <i>Salvia miltiorrhiza</i> ) [18], pigment betalain in beetroot ( <i>Beta vulgaris</i> ) [19]. Metabolism of xenobiotics in <i>A. thaliana</i> [20]. |
| CYP72  | 36                            | 33                          | Biosynthesis of monoterpene indole alkaloids in <i>C. roseus</i> [14,21], glycyrrhizin in licorice ( <i>Glycyrrhiza</i> ) [22], saponins in <i>M. truncatula</i> [23].                                                                                                                                                                                                                                                                               |
| CYP79  | 26                            | 25                          | Biosynthesis of cyanogenic glucosides in sorghum [24], cassava ( <i>M. esculenta</i> ) [25] and other plant species, glucosinolates in brassicaceae [26–28].                                                                                                                                                                                                                                                                                         |
| CYP89  | 25                            | 21                          | Chlorophyll degradation in <i>A. thaliana</i> [29].                                                                                                                                                                                                                                                                                                                                                                                                  |
| CYP75  | 24                            | 23                          | Biosynthesis of flavonoids in <i>Petunia x hybrida</i> , <i>A. thaliana</i> , <i>Gentiana triflora</i> , <i>C. roseus</i> , etc. [9]                                                                                                                                                                                                                                                                                                                 |
| CYP716 | 23                            | 12                          | Biosynthesis of saponins in <i>M. truncatula</i> [30] and <i>Maesa lanceolata</i> [31,32].                                                                                                                                                                                                                                                                                                                                                           |
| CYP706 | 21                            | 19                          | Biosynthesis of sesquiterpenoids in cotton ( <i>Gossypium arboreum</i> ) [33].                                                                                                                                                                                                                                                                                                                                                                       |
| CYP87  | 20                            | 15                          | Biosynthesis of saponins in <i>Maesa lanceolata</i> [31].                                                                                                                                                                                                                                                                                                                                                                                            |
| CYP714 | 16                            | 13                          | Degradation or biosynthesis of hormones (gibberelins) in rice ( <i>O. sativa</i> ) [34].                                                                                                                                                                                                                                                                                                                                                             |
| CYP736 | 13                            | 11                          | Unknown. Pathogen response in grapevine <i>V. vinifera</i> [35].                                                                                                                                                                                                                                                                                                                                                                                     |
| CYP728 | 11                            | 9                           | Unknown.                                                                                                                                                                                                                                                                                                                                                                                                                                             |
| CYP80  | 10                            | 9                           | Alkaloid biosynthesis in barberry ( <i>Berberis stolonifera</i> ) [36] and California poppy ( <i>Eschscholzia californica</i> ) [37].                                                                                                                                                                                                                                                                                                                |
| CYP96  | 9                             | 9                           | Biosynthesis of cuticular wax in <i>A. thaliana</i> [38].                                                                                                                                                                                                                                                                                                                                                                                            |
| CYP721 | 8                             | 8                           | Unknown.                                                                                                                                                                                                                                                                                                                                                                                                                                             |
| CYP74  | 7                             | 7                           | Biosynthesis of jasmonates and C6 volatiles in <i>A. thaliana</i> and other plants [39–41].                                                                                                                                                                                                                                                                                                                                                          |
| CYP92  | 7                             | 5                           | Unknown.                                                                                                                                                                                                                                                                                                                                                                                                                                             |
| CYP93  | 7                             | 6                           | Biosynthesis of flavonoids in soybean ( <i>G. max</i> ), <i>Glycyrrhiza echinata</i> , <i>Gerbera hybrid</i> , <i>Antirrhinum majus</i> , <i>Torrenia hybrid</i> , etc. [9,42]                                                                                                                                                                                                                                                                       |
| CYP712 | 6                             | 5                           | Unknown.                                                                                                                                                                                                                                                                                                                                                                                                                                             |

## References specifically cited in S1 Table

1. Lee S, Badieyan S, Bevan DR, Herde M, Gatz C, Tholl D. Herbivore-induced and floral homoterpene volatiles are biosynthesized by a single P450 enzyme (CYP82G1) in *Arabidopsis*. *Proc Natl Acad Sci U S A*. 2010;107: 21205–10. doi:10.1073/pnas.1009975107
2. Beaudoin G a W, Facchini PJ. Isolation and characterization of a cDNA encoding (S)-cis-N-methylstylopine 14-hydroxylase from opium poppy, a key enzyme in sanguinarine biosynthesis. *Biochem Biophys Res Commun*. 2013;431: 597–603. doi:10.1016/j.bbrc.2012.12.129
3. Dang T-TT, Facchini PJ. CYP82Y1 Is N-Methylcanadine 1-Hydroxylase, a Key Noscapine Biosynthetic Enzyme in Opium Poppy. *J Biol Chem*. 2014;289: 2013–2026. doi:10.1074/jbc.M113.505099
4. Farrow SC, Hagel JM, Beaudoin G a W, Burns DC, Facchini PJ. Stereochemical inversion of (S)-reticuline by a cytochrome P450 fusion in opium poppy. *Nat Chem Biol*. Nature Publishing Group; 2015;11: 728–732. doi:10.1038/nchembio.1879
5. Haudenschild C, Schalk M, Karp F, Croteau R. Functional expression of regiospecific cytochrome P450 limonene hydroxylases from mint (*Mentha* spp.) in *Escherichia coli* and *Saccharomyces cerevisiae*. *Arch Biochem Biophys*. 2000;379: 127–36. doi:10.1006/abbi.2000.1864
6. Jørgensen K, Morant AV, Morant M, Jensen NB, Olsen CE, Kannangara R, et al. Biosynthesis of the cyanogenic glucosides linamarin and lotaustralin in cassava: isolation, biochemical characterization, and expression pattern of CYP71E7, the oxime-metabolizing cytochrome P450 enzyme. *Plant Physiol*. 2011;155: 282–92. doi:10.1104/pp.110.164053
7. Larbat R, Hehn A, Hans J, Schneider S, Jugdé H, Schneider B, et al. Isolation and functional characterization of CYP71AJ4 encoding for the first P450 monooxygenase of angular furanocoumarin biosynthesis. *J Biol Chem*. 2009;284: 4776–85. doi:10.1074/jbc.M807351200
8. Teoh KH, Polichuk DR, Reed DW, Nowak G, Covello PS. *Artemisia annua* L. (Asteraceae) trichome-specific cDNAs reveal CYP71AV1, a cytochrome P450 with a key role in the biosynthesis of the antimalarial sesquiterpene lactone artemisinin. *FEBS Lett*. 2006;580: 1411–6. doi:10.1016/j.febslet.2006.01.065
9. Ayabe S, Akashi T. Cytochrome P450s in flavonoid metabolism. *Phytochem Rev*. 2006;5: 271–282. doi:10.1007/s11101-006-9007-3
10. Pfalz M, Vogel H, Kroymann J. The Gene Controlling the Indole Glucosinolate Modifier1 Quantitative Trait Locus Alters Indole Glucosinolate Structures and Aphid Resistance in *Arabidopsis*. *Plant Cell*. 2009;21: 985–999. doi:10.1105/tpc.108.063115
11. Ono E, Nakai M, Fukui Y, Tomimori N, Fukuchi-Mizutani M, Saito M, et al. Formation of two methylenedioxy bridges by a *Sesamum* CYP81Q protein yielding a furofuran lignan, (+)-sesamin. *Proc Natl Acad Sci*. 2006;103: 10116–10121. doi:10.1073/pnas.0603865103
12. Boachon B, Junker RR, Miesch L, Bassard J-E, Höfer R, Caillieaudeaux R, et al. CYP76C1 (Cytochrome P450)-Mediated Linalool Metabolism and the Formation of Volatile and Soluble Linalool Oxides in *Arabidopsis* Flowers: A Strategy for Defense against Floral Antagonists. *Plant Cell*. 2015;27: 2972–90. doi:10.1105/tpc.15.00399
13. Collu G, Unver N, Peltenburg-Looman AMG, van der Heijden R, Verpoorte R, Memelink J. Geraniol 10-hydroxylase, a cytochrome P450 enzyme involved in terpenoid indole alkaloid biosynthesis. *FEBS Lett*. 2001;508: 215–220. doi:10.1016/S0014-5793(01)03045-9

14. Miettinen K, Dong L, Navrot N, Schneider T, Burlat V, Pollier J, et al. The seco-iridoid pathway from *Catharanthus roseus*. *Nat Commun*. 2014;5: 3606. doi:10.1038/ncomms4606
15. Diaz-Chavez ML, Moniodis J, Madilao LL, Jancsik S, Keeling CI, Barbour EL, et al. Biosynthesis of Sandalwood Oil: *Santalum album* CYP76F Cytochromes P450 Produce Santalols and Bergamotol. *PLoS One*. 2013;8: e75053. doi:10.1371/journal.pone.0075053
16. Swaminathan S, Morrone D, Wang Q, Fulton DB, Peters RJ. CYP76M7 is an ent-cassadiene C11 $\alpha$ -hydroxylase defining a second multifunctional diterpenoid biosynthetic gene cluster in rice. *Plant Cell*. 2009;21: 3315–25. doi:10.1105/tpc.108.063677
17. Wang Q, Hillwig ML, Okada K, Yamazaki K, Wu Y, Swaminathan S, et al. Characterization of CYP76M5-8 indicates metabolic plasticity within a plant biosynthetic gene cluster. *J Biol Chem*. 2012;287: 6159–68. doi:10.1074/jbc.M111.305599
18. Guo J, Zhou YJ, Hillwig ML, Shen Y, Yang L, Wang Y, et al. CYP76AH1 catalyzes turnover of miltiradiene in tanshinones biosynthesis and enables heterologous production of ferruginol in yeasts. *Proc Natl Acad Sci*. 2013; 1–6. doi:10.1073/pnas.1218061110
19. Hatlestad GJ, Sunnadeniya RM, Akhavan N a, Gonzalez A, Goldman IL, McGrath JM, et al. The beet R locus encodes a new cytochrome P450 required for red betalain production. *Nat Genet*. Nature Publishing Group; 2012;44: 816–20. doi:10.1038/ng.2297
20. Hofer R, Boachon B, Renault H, Gavira C, Miesch L, Iglesias J, et al. Dual function of the cytochrome P450 CYP76 family from *Arabidopsis thaliana* in the metabolism of monoterpenols and phenylurea herbicides. *Plant Physiol*. 2014;166: 1149–1161. doi:10.1104/pp.114.244814
21. Irmeler S, Schröder G, St-Pierre B, Crouch NP, Hotze M, Schmidt J, et al. Indole alkaloid biosynthesis in *Catharanthus roseus*: New enzyme activities and identification of cytochrome P450 CYP72A1 as secologanin synthase. *Plant J*. 2000;24: 797–804. doi:10.1046/j.1365-313X.2000.00922.x
22. Seki H, Sawai S, Ohyama K, Mizutani M, Ohnishi T, Sudo H, et al. Triterpene functional genomics in licorice for identification of CYP72A154 involved in the biosynthesis of glycyrrhizin. *Plant Cell*. 2011;23: 4112–23. doi:10.1105/tpc.110.082685
23. Biazzi E, Carelli M, Tava A, Abbruscato P, Losini I, Avato P, et al. CYP72A67 catalyses a key oxidative step in *Medicago truncatula* hemolytic saponin biosynthesis. *Mol Plant*. Elsevier Ltd; 2015;8: 1493–1506. doi:10.1016/j.molp.2015.06.003
24. Clausen M, Kannangara RM, Olsen CE, Blomstedt CK, Gleadow RM, Jørgensen K, et al. The bifurcation of the cyanogenic glucoside and glucosinolate biosynthetic pathways. *Plant J*. 2015;84: 558–573. doi:10.1111/tpj.13023
25. Andersen MD. Cytochromes P-450 from Cassava (*Manihot esculenta* Crantz) Catalyzing the First Steps in the Biosynthesis of the Cyanogenic Glucosides Linamarin and Lotaustralin. *J Biol Chem*. 2000;275: 1966–1975. doi:10.1074/jbc.275.3.1966
26. Mikkelsen MD, Hansen CH, Wittstock U, Halkier B a. Cytochrome P450 CYP79B2 from *Arabidopsis* catalyzes the conversion of tryptophan to indole-3-acetaldoxime, a precursor of indole glucosinolates and indole-3-acetic acid. *J Biol Chem*. 2000;275: 33712–7. doi:10.1074/jbc.M001667200
27. Wittstock U. Cytochrome P450 CYP79A2 from *Arabidopsis thaliana* L. Catalyzes the Conversion of L-Phenylalanine to Phenylacetaldoxime in the Biosynthesis of Benzylglucosinolate. *J Biol Chem*. 2000;275: 14659–14666. doi:10.1074/jbc.275.19.14659
28. Hansen CH. Cytochrome P450 CYP79F1 from *Arabidopsis* Catalyzes the Conversion of

- Dihomomethionine and Trihomomethionine to the Corresponding Aldoximes in the Biosynthesis of Aliphatic Glucosinolates. *J Biol Chem.* 2001;276: 11078–11085. doi:10.1074/jbc.M010123200
29. Christ B, Sussenbacher I, Moser S, Bichsel N, Egert A, Muller T, et al. Cytochrome P450 CYP89A9 Is Involved in the Formation of Major Chlorophyll Catabolites during Leaf Senescence in Arabidopsis. *Plant Cell.* 2013;25: 1868–1880. doi:10.1105/tpc.113.112151
  30. Carelli M, Biazzi E, Panara F, Tava A, Scaramelli L, Porceddu A, et al. *Medicago truncatula* CYP716A12 is a multifunctional oxidase involved in the biosynthesis of hemolytic saponins. *Plant Cell.* 2011;23: 3070–81. doi:10.1105/tpc.111.087312
  31. Moses T, Pollier J, Faizal A, Apers S, Pieters L, Thevelein JM, et al. Unravelling the Triterpenoid Saponin Biosynthesis of the African Shrub *Maesa lanceolata*. *Mol Plant.* 2014; doi:10.1093/mp/ssu110
  32. Miettinen K, Pollier J, Buyst D, Arendt P, Csuk R, Sommerwerk S, et al. The ancient CYP716 family is a major contributor to the diversification of eudicot triterpenoid biosynthesis. *Nat Commun. Nature Publishing Group;* 2017;8: 14153. doi:10.1038/ncomms14153
  33. Luo P, Wang YH, Wang GD, Essenberg M, Chen XY. Molecular cloning and functional identification of (+)-delta-cadinene-8-hydroxylase, a cytochrome P450 mono-oxygenase (CYP706B1) of cotton sesquiterpene biosynthesis. *Plant J.* 2001;28: 95–104. doi:10.1046/j.1365-313X.2001.01133.x
  34. Magome H, Nomura T, Hanada A, Takeda-Kamiya N, Ohnishi T, Shinma Y, et al. CYP714B1 and CYP714B2 encode gibberellin 13-oxidases that reduce gibberellin activity in rice. *Proc Natl Acad Sci U S A.* 2013;110: 1947–52. doi:10.1073/pnas.1215788110
  35. Cheng DW, Lin H, Takahashi Y, Walker MA, Civerolo EL, Stenger DC. Transcriptional regulation of the grape cytochrome P450 monooxygenase gene CYP736B expression in response to *Xylella fastidiosa* infection. *BMC Plant Biol.* 2010;10: 135. doi:10.1186/1471-2229-10-135
  36. Kraus PF, Kutchan TM. Molecular cloning and heterologous expression of a cDNA encoding berbamin synthase, a C–O phenol-coupling cytochrome P450 from the higher plant *Berberis stolonifera*. *Proc Natl Acad Sci U S A.* 1995;92: 2071–2075. doi:10.1073/pnas.92.6.2071
  37. Pauli HH, Kutchan TM. Molecular cloning and functional heterologous expression of two alleles encoding (S)-N-methylcoclaurine 3'-hydroxylase (CYP80B1), a new methyl jasmonate-inducible cytochrome P-450-dependent mono-oxygenase of benzyloisoquinoline alkaloid biosynthesis. *Plant J.* 1998;13: 793–801.
  38. Greer S, Wen M, Bird D, Wu X, Samuels L, Kunst L, et al. The cytochrome P450 enzyme CYP96A15 is the midchain alkane hydroxylase responsible for formation of secondary alcohols and ketones in stem cuticular wax of Arabidopsis. *Plant Physiol.* 2007;145: 653–667. doi:10.1104/pp.107.107300
  39. Laudert D, Pfannschmidt U, Lottspeich F, Holländer-Czytko H, Weiler EW. Cloning, molecular and functional characterization of Arabidopsis thaliana allene oxide synthase (CYP 74), the first enzyme of the octadecanoid pathway to jasmonates. *Plant Mol Biol.* 1996;31: 323–335. doi:10.1007/BF00021793
  40. Park JH, Halitschke R, Kim HB, Baldwin IT, Feldmann K a., Feyereisen R. A knock-out mutation in allene oxide synthase results in male sterility and defective wound signal transduction in Arabidopsis due to a block in jasmonic acid biosynthesis. *Plant J.* 2002;31: 1–12. doi:10.1046/j.1365-313X.2002.01328.x
  41. Hughes RK, De Domenico S, Santino A. Plant cytochrome CYP74 family: Biochemical features,

endocellular localisation, activation mechanism in plant defence and improvements for industrial applications. *ChemBioChem*. 2009;10: 1122–1133. doi:10.1002/cbic.200800633

42. Du H, Ran F, Dong H-L, Wen J, Li J-N, Liang Z. Genome-Wide Analysis, Classification, Evolution, and Expression Analysis of the Cytochrome P450 93 Family in Land Plants. *PLoS One*. Public Library of Science; 2016;11: e0165020. doi:10.1371/journal.pone.0165020
