# Supplementary material for: Annotation, classification, genomic organization and expression of the Vitis vinifera CYPome
Source: PubMed Central journal article supplement (PMC6023221; doi:10.1371/journal.pone.0199902), 2018-06-28
Supplement: pone.0199902.s008.pdf [file pone.0199902.s008.pdf]

**S2 Table. Description of RNA-Seq experiments used for analysis of gene expression.**

| Genotypes                                 | Tissue  | Conditions                                                         | Number of datasets used | Reference                               |
|-------------------------------------------|---------|--------------------------------------------------------------------|-------------------------|-----------------------------------------|
| Carignan                                  | Leaves  | Infection with powdery mildew pathogen<br><i>Erysiphe necator</i>  | 12                      | Jones et al., 2014;<br>PRJNA254035      |
| Pinot noir                                | Leaves  | Infection with downy mildew pathogen<br><i>Plasmopara viticola</i> | 10                      | Perazzolli et al., 2012;<br>PRJNA168987 |
| Touriga Nacional, <i>Vitis sylvestris</i> | Flowers | Development                                                        | 23                      | Ramos et al., 2014;<br>PRJNA244752      |
| Tannat                                    | Berries | Development                                                        | 4                       | Da Silva et al., 2013;<br>PRJNA203687   |
| Shiraz                                    | Berries | Development                                                        | 4                       | Sweetman et al., 2012                   |
| Corvina                                   | Berries | Development                                                        | 2                       | Venturini et al., 2013;<br>PRJNA169607  |
| Riesling, Gewurztraminer                  | Berries | Development                                                        | 4                       | PRJNA378596                             |
| Sangiovese, Barbera, Negro amaro, Refosco | Berries | Development                                                        | 48                      | Palumbo et al., 2014;<br>PRJNA265040    |
